# Supplementary material for: Isolation of Vibrio cholerae and Vibrio vulnificus from Estuarine Waters, and Genotyping of V. vulnificus Isolates Using Loop-Mediated Isothermal Amplification
Source: MDPI journal article supplement (doi:10.3390/microorganisms12050877), 2024-04-27
Supplement: s1 [file s1]

## Supplementary Materials

**Table S1.** Types of genes in genotypes 1 and 2 of *V. vulnificus*

| *Genotype | Biotype | Type of the gene |          |                 |
|-----------|---------|------------------|----------|-----------------|
|           |         | <i>vvhA</i> gene | 16S rDNA | <i>vcg</i> gene |
| 1         | 1 and 3 | Type 1           | Type B   | Type C          |
| 2         | 2       | Type 2           | Type A   | Type E          |

\* Strains in genotype 1 are pathogenic to human, whereas some strains in genotype 2 (having a large plasmid) are pathogenic to eels and human.
